## Predicting heart failure transition and progression: a weighted risk score from bio-humoral, cardiopulmonary and echocardiographic stress testing

Pugliese NR.<sup>1</sup>; De Biase N.<sup>1</sup>; Conte L.<sup>2</sup>; Gargani L.<sup>3</sup>; Mazzola M.<sup>1</sup>; Fabiani I.<sup>4</sup>; Natali A.<sup>1</sup>; Dini FL.<sup>1</sup>; Frumento P.<sup>5</sup>; Rosada J.<sup>6</sup>; Taddei S.<sup>1</sup>; Borlaug BA.<sup>7</sup>; Masi S.<sup>1</sup>

<sup>1</sup>Azienda Ospedaliero Universitaria Pisana, Pisa, Italy

<sup>2</sup>Castelnuovo Garfagnana Hospital, Castelnuovo Garfagnana, Italy

<sup>3</sup>National Council of Research, Pisa, Italy

<sup>4</sup>Fondazione Toscana Gabriele Monasterio, Pisa, Italy

<sup>5</sup>University of Pisa, Pisa, Italy

<sup>6</sup>University Hospital of Pisa, Fourth Unit of Internal Medicine, Pisa, Italy

<sup>7</sup>Mayo Clinic, Rochester, United States of America

**Funding Acknowledgements:** Type of funding sources: None.

**Aims.** We tested the prognostic role of a risk score including bio-humoral evaluation, cardiopulmonary-echocardiographic stress (CPET-ESE) and lung ultrasound, in patients with heart failure (HF) with reduced and preserved ejection fraction (HFrEF and HFpEF), and subjects at risk of developing HF (American College of Cardiology/American Heart Association Stages A and B).

**Methods and results.** We evaluated 318 subjects: 94 in Stages A-B, 194 in Stage C (85 HFpEF and 109 HFrEF), and 30 age and sex-matched controls (Stage 0). During a median follow-up of 18.5 months, we reported 40 urgent HF visits, 31 HF hospitalisations and 10 cardiovascular deaths. Cox proportional-hazards regression for predicting adverse events identified five independent predictors and each was assigned a number of points proportional to its regression coefficient:  $\Delta$ stress-rest B-lines >10 (3 points), peak oxygen consumption <16 mL/kg/min (2 points), minute ventilation/carbon dioxide production slope  $\geq$ 36 (2 points), peak systolic pulmonary artery pressure  $\geq$ 50 mmHg (1 point) and resting N-terminal pro-brain natriuretic peptide (NT-proBNP) >900 pg/mL (1 point). We defined three risk categories: low-risk (<3 points), intermediate-risk (3-6 points), and high-risk (>6 points). The event-free survival probability for these three groups were 93%, 52% and 20%, respectively. Hazard Ratio was 4.55 for each risk category upgrade (95% confidence interval [CI], 3.44-5.93). The area-under-curve for the scoring system to predict events was 0.92 (95% CI 0.88-0.96).

**Conclusion.** A multiparametric risk score including indices of exercise-induced pulmonary congestion, markers of cardiopulmonary dysfunction and NT-proBNP identifies patients at increased risk for HF events across the HF spectrum.

Table 1

| Variable                            | EPYC score  | EPYC score <3<br>(low risk)<br>n = 217 | EPYC score 3-6 (intermediate risk)<br>n = 70 | EPYC score >6<br>(high risk)<br>n = 31 | p-value<br>(between risk categories) |
|-------------------------------------|-------------|----------------------------------------|----------------------------------------------|----------------------------------------|--------------------------------------|
| Event-free (n = 244)                | 0 (0 - 2)   | 210 (97)                               | 32 (46)                                      | 2 (6)                                  | <0.0001                              |
| With events (n = 74)                | 6 (4 - 9)   | 7 (3)                                  | 38 (54)                                      | 29 (94)                                | <0.0001                              |
| p-value (event-free vs with events) | <0.0001     | <0.0001                                | <0.0001                                      | <0.0001                                |                                      |
| Stage 0-Controls (n = 30)           | 0 (0 - 1)   | 30                                     | 0                                            | 0                                      | <0.0001                              |
| Stages A-B (n = 94)                 | 1 (0 - 2)   | 85 (45)                                | 6 (9)                                        | 3 (10)                                 | <0.0001                              |
| Stage C-HFpEF (n = 85)              | 3 (1 - 6)*† | 46 (25)                                | 29 (41)                                      | 10 (32)                                | <0.0001                              |
| Stage C-HFrEF (n = 109)             | 4 (2 - 7)*† | 56 (30)                                | 35 (50)                                      | 18 (58)                                | <0.0001                              |
| p-value (between HF Stages)         | <0.0001     | <0.0001                                | <0.0001                                      | <0.0001                                |                                      |

Values are mean  $\pm$  standard deviation, n (%), or median [25th quartile, 75th quartile]. \* p < 0.01 vs Stage 0-Controls; † p < 0.01 vs Stages A-B.

Abstract Figure 1

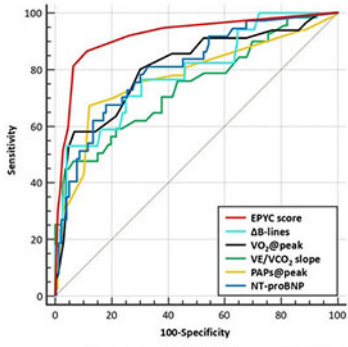

| Variable                         | Cut-off | AUC (95% CI)       | Sensitivity (%) | Specificity (%) |
|----------------------------------|---------|--------------------|-----------------|-----------------|
| EPYC score                       | ≥3      | 0.92 (0.88 – 0.96) | 87              | 89              |
| ΔB-lines                         | >10     | 0.77 (0.72 – 0.82) | 68              | 85              |
| VO <sub>2</sub> , mL/min/kg@peak | <16     | 0.80 (0.74 – 0.84) | 66              | 86              |
| VE/VCO <sub>2</sub> slope        | ≤36     | 0.75 (0.69 – 0.80) | 55              | 89              |
| PAs, mmHg@peak                   | ≥50     | 0.72 (0.62 – 0.80) | 81              | 67              |
| NT-proBNP, pg/mL                 | >900    | 0.81 (0.75 – 0.86) | 68              | 85              |
